# Supplementary material for: Exploring the structural relationship between encapsulated antimicrobial peptides and the bilayer membrane mimetic lipidic cubic phase: studies with gramicidin A′
Source: Royal Society of Chemistry journal article supplement (doi:10.1039/c6ra13658c), 2016-01-01
Supplement: c6ra13658c1.pdf [file c6ra13658c1.pdf]

**Exploring the structural relationship between encapsulated antimicrobial peptides and the bilayer membrane mimetic lipidic cubic phase: Studies with gramicidin A'**

**Supporting information**

Thomas G. Meikle<sup>ab</sup>, Charlotte E. Conn<sup>c</sup>, Frances Separovic<sup>a</sup>, Calum Drummond<sup>bc</sup>

<sup>a</sup> School of Chemistry, Bio21 Institute, University of Melbourne, VIC 3010, Australia

<sup>b</sup> CSIRO Manufacturing Flagship, Bag 10 Clayton VIC 3169, Australia

<sup>c</sup> School of Applied Sciences, College of Science, Engineering and Health, RMIT University, 124 La Trobe Street, Melbourne VIC 3000, Australia. Email: calum.drummond@rmit.edu.au

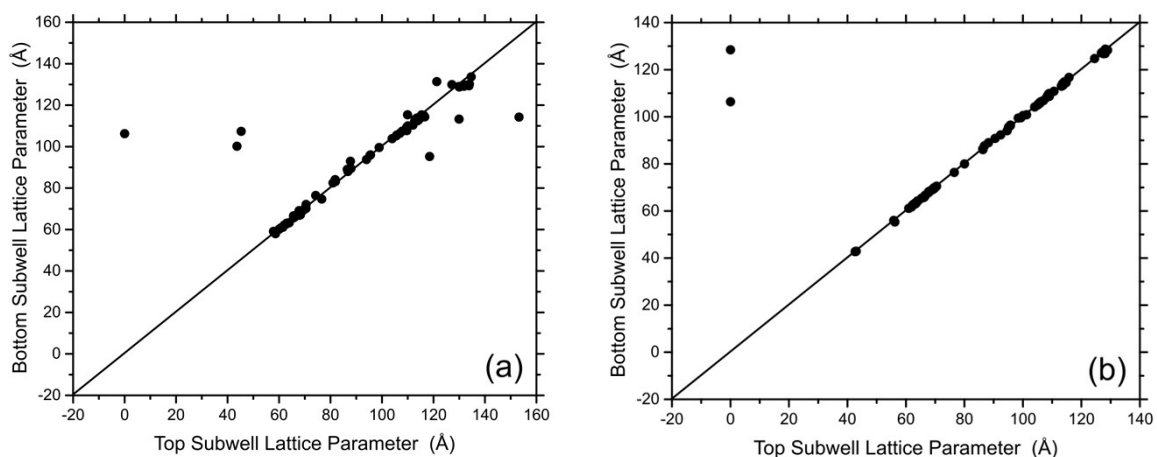

**Figure S1.** Plots of lattice parameters for top vs. bottom well, for (a) 2 h, and (b) 48 h time points.

**Table S1:** The parameters resulting from fitting a first order decay function to the plots of lattice parameter (Å) vs.  $gA'$  concentration (mol%).

$$\text{Model: } y = y_0 + A_1 e^{-x/t_1}$$

| Sample                                     | $y_0$ | $A_1$ | $t_1$ |
|--------------------------------------------|-------|-------|-------|
| Monoolein ( $Q_{II}^D$ )                   | 66.28 | 41.15 | 3.20  |
| Monoolein 8 wt% Cholesterol ( $Q_{II}^D$ ) | 64.70 | 48.82 | 2.89  |
| Monopalmitolein ( $Q_{II}^D$ )             | 66.69 | 48.56 | 3.96  |
| Monovaccenin ( $Q_{II}^D$ )                | 69.99 | 60.68 | 2.42  |
| Phytantriol ( $Q_{II}^D$ )                 | 65.88 | 3.58  | 2.42  |
| Phytanoyl monoethanolamide ( $Q_{II}^D$ )  | 57.95 | 5.07  | 5.21  |

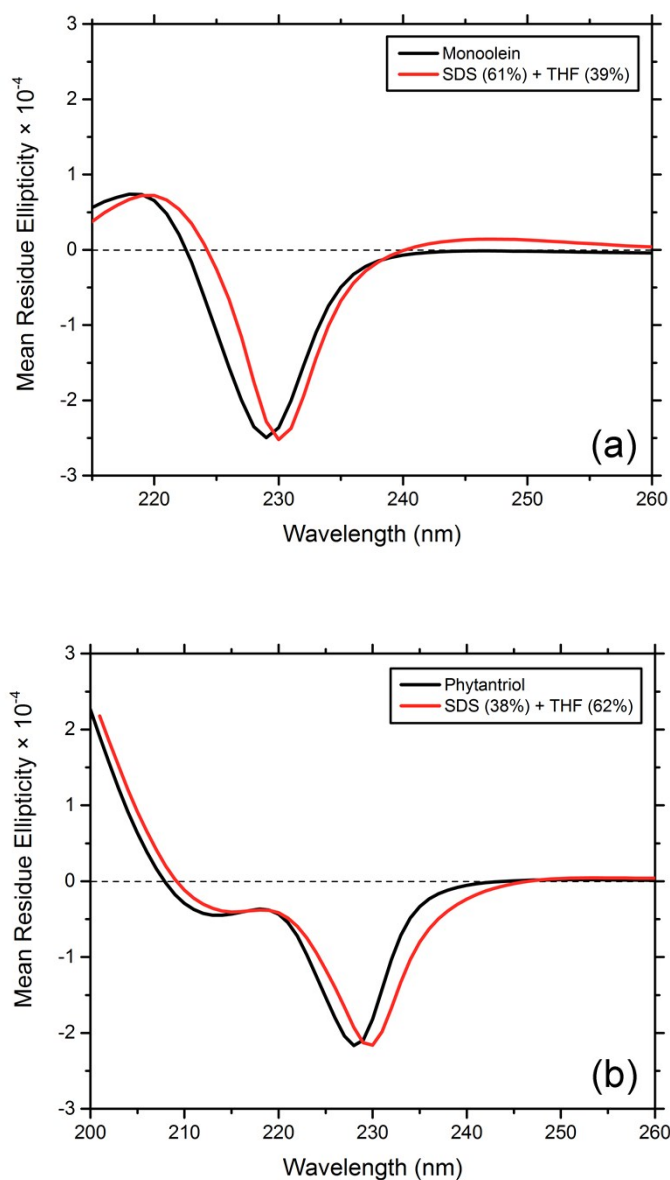

**Figure S2:** Comparison of the CD spectra of gA' encapsulated in monoolein (a), and phytantriol (b) with a weighted intensity-adjusted combination of the spectra of gA' in SDS micelles and THF.
